# Supplementary figures and images for: Budget impact analysis of routinely using whole-genomic sequencing of six multidrug-resistant bacterial pathogens in Queensland, Australia
Source: HighWire-hosted journal article supplement (doi:10.1136/bmjopen-2020-041968), 2021-02-01

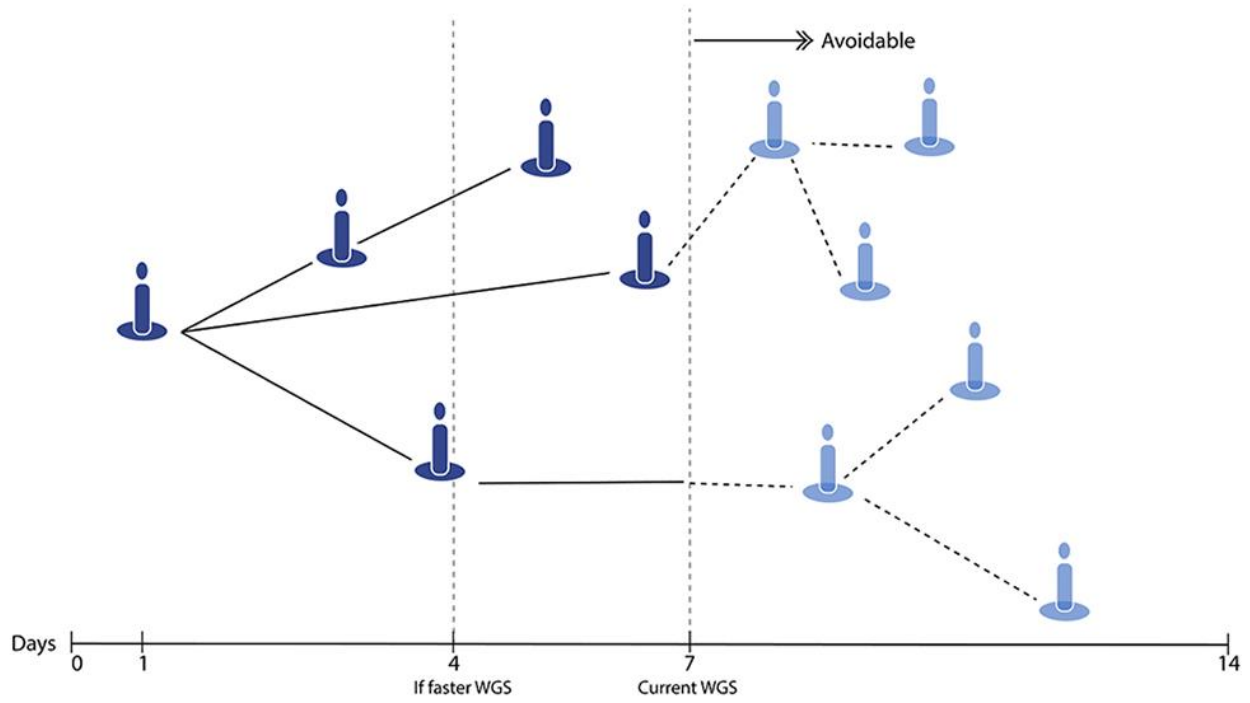

Supplement: bmjopen-2020-041968supp001_data_supplement.pdf [file bmjopen-2020-041968supp001_data_supplement.pdf]
